# Supplementary material
Source: PubMed Central journal article supplement (PMC5380592)
Supplement: NIHMS854150-supplement.pdf [file NIHMS854150-supplement.pdf]

**A** AVP/Aldh1L1-GFP<sup>NLS</sup>/DAPI

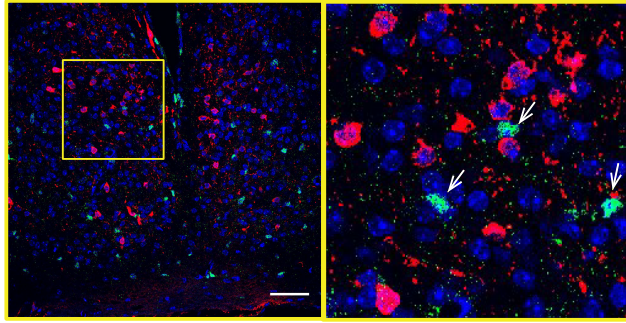

**Figure S1. Aldh1L1-GFP<sup>NLS</sup> does not label SCN neurons. Related to Figure 1.**  
(A) Astrocyte nuclei in the SCN were labeled (green) by Cre-mediated recombination of Aldh1L1-Cre/+;LSL-GFP<sup>NLS</sup>/+ mice and then coronal brain sections were immunostained for AVP (red). The locations of the magnified images are indicated by yellow squares in the low-power images. Arrowheads illustrate that none of the Aldh1L1-positive cells labeled for AVP. Scale bar = 75  $\mu$ m.

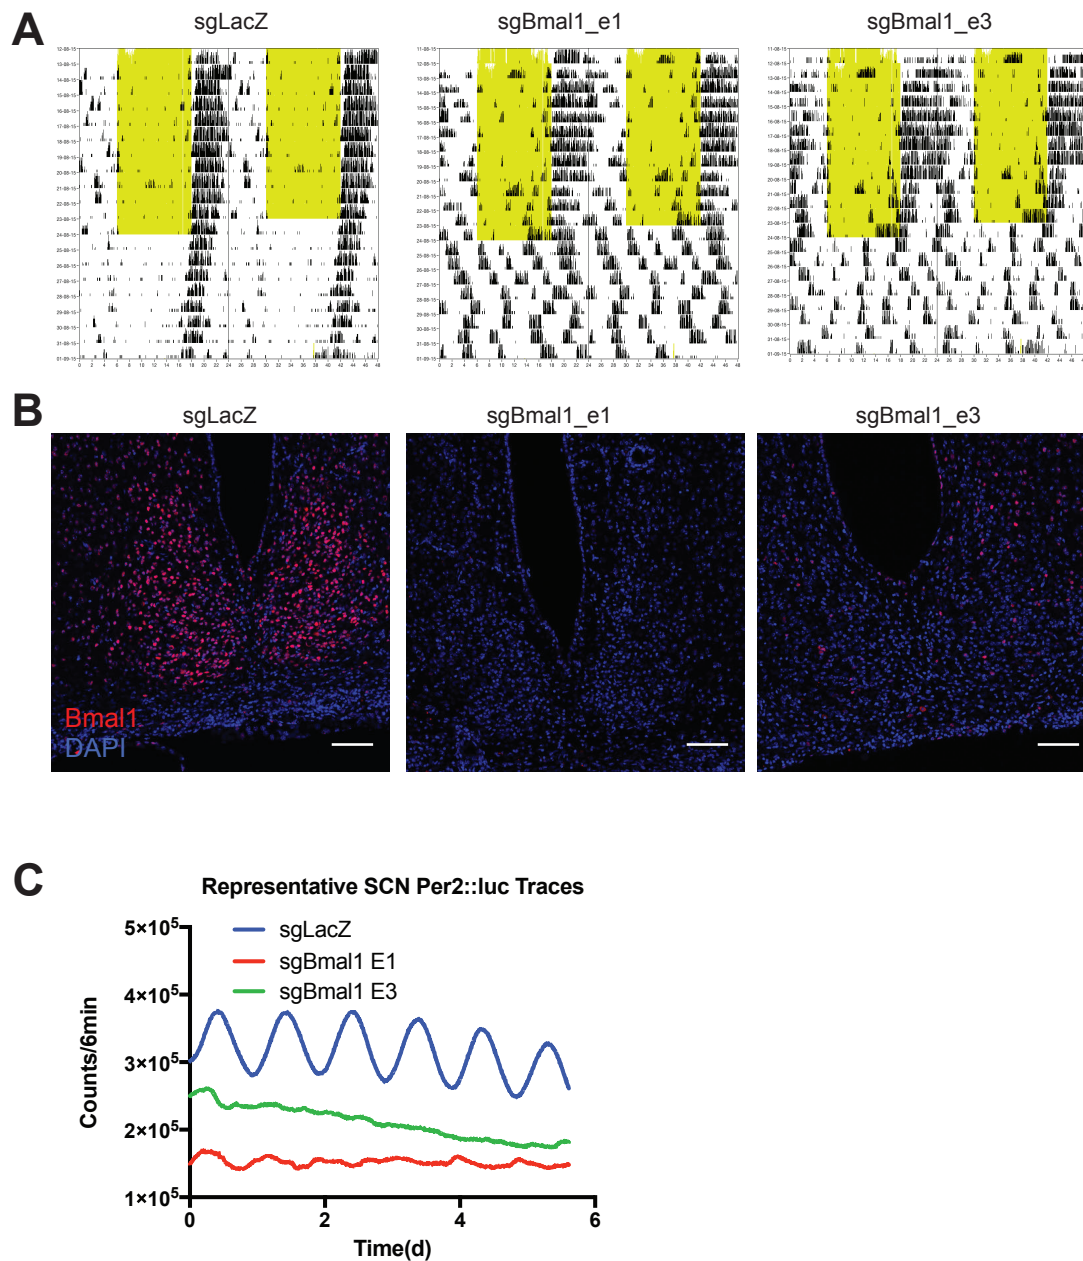

**Figure S2. Loss of Bmal1 from all SCN cells phenocopies the global Bmal1 knockout. Related to Figure 3.** (A) Representative actograms of LSL-Cas9/+; PER2::luc/+ animals which were injected with AAV carrying pCBh-Cre and either sgRNA against LacZ or Bmal1 (exon 1 or exon3) to the SCN. (B) BMAL1 staining (red) in the SCN of the animals shown in (A). (C) Representative PER2::luc traces from SCN slices which were infected with AAV carrying pCBh-Cre and either sgRNA against LacZ or Bmal1 (exon 1 [E1] or exon3[E3]). Note the arrhythmic PER2 expression in the two SCN where BMAL1-deletion was targeted to all cells and the circadian rhythm in the control.

**Table S1: Summary statistics on AAV2/10-Bmal1ext-DIO-luc experiments. Related to Figure 2.**

| Genotype                      | Virus Added                                         | Period       | Amplitude<br>****   | Goodness<br>of Fit *** | Mean Bioluminescence<br>(Counts/10min)* |
|-------------------------------|-----------------------------------------------------|--------------|---------------------|------------------------|-----------------------------------------|
| Aldh1L1-Cre/+<br>(n = 6 mice) | AAV2/10-Bmal1ext-DIO-luc                            | 23.6 ± 0.2 h | 0.014 ±<br>0.002*   | 0.97 ±<br>0.007***     | 1,645,662 ±<br>578,301*                 |
| VIP-IRES-Cre<br>(n = 4 mice)  | AAV2/10-Bmal1ext-DIO-luc                            | 23.1 ± 0.7 h | 0.014 ±<br>0.003*   | 0.93 ±<br>0.03**       | 211,203 ±<br>13,778                     |
| WT (n = 2 mice)               | AAV2/10-Bmal1ext-DIO-luc +<br>AAV2/8-pCBh-Cre (1:1) | 22.6 ± 0.1 h | 0.033±<br>0.004**** | 0.98 ±<br>0.003**      | 178,785 ±<br>6,359                      |
| WT (n = 7 mice)               | AAV2/10-Bmal1ext-DIO-luc                            | N.A.         | 0.006 ±<br>0.002    | 0.60 ±<br>0.07         | 92,647 ±<br>11,855                      |

Statistics: One-way ANOVA with Bonferroni's multiple comparison test compared to no Cre control (underlined). \*: p< 0.05; \*\*: p<0.01; \*\*\*: p< 0.001; \*\*\*\*: p<0.0001.

**Table S2. Detailed descriptions of the genetic manipulations in each figure. Related to all figures.**

Glossary

Cre: Cre recombinase

Cas9: CRISPR-associated protein 9

DIO: double-floxed inverted orientation. Activated by Cre.

GFP: Green fluorescence protein

LSL: loxP-STOP-loxP. Activated by Cre

Luc: firefly luciferase

NLS: nuclear-localization signal

Rosa26: A mouse genomic locus commonly used for constitutive, ubiquitous expression.

sgBmal1\_E1: sgRNA targeting exon 1 of *Bmal1*

sgBmal1\_E3: sgRNA targeting exon 3 of *Bmal1*

All injections targeted the bilateral SCN.

| Treatment                    | Full genotype                               | Description of genotype                                                                                                                                            | Virus Injected             | Description of Virus                                          |
|------------------------------|---------------------------------------------|--------------------------------------------------------------------------------------------------------------------------------------------------------------------|----------------------------|---------------------------------------------------------------|
| Fig. 1 and S1                |                                             |                                                                                                                                                                    |                            |                                                               |
| Aldh1L1-GFP <sup>NLS</sup>   | Aldh1L1-Cre/+;<br>LSL-GFP <sup>NLS</sup> /+ | Rosa26 knockin of LSL-GFP <sup>NLS</sup> driven by ubiquitous promoter. Expression of nuclear-localized GFP was activated by Cre recombinase in Aldh1L1 (+) cells. | None.                      | None.                                                         |
| Figure 2 and Table S2        |                                             |                                                                                                                                                                    |                            |                                                               |
| Aldh1L1-Bmal1 <sup>luc</sup> | Aldh1L1-Cre/+                               | Cre recombinase was expressed in Aldh1L1 (+) cells.                                                                                                                | AAV2/10-Bmal1ext-DIO-luc   | Bmal1 <sup>luc</sup> was activated only in Aldh1L1 (+) cells. |
| VIP-Bmal1 <sup>luc</sup>     | VIP-IRES-Cre                                | Cre recombinase was expressed in vasoactive intestinal polypeptide (+) neurons.                                                                                    | AAV2/10-Bmal1ext-DIO-luc   | Bmal1 <sup>luc</sup> was activated only in VIP (+) neurons.   |
| Positive Control             | WT (No Cre)                                 | WT mice.                                                                                                                                                           | AAV2/10-Bmal1ext-DIO-luc + | Bmal1 <sup>luc</sup> was activated ubiquitously.              |

|                     |                                           |                                                                                                                                                                    |                                                                    |                                                                                                                                                                            |
|---------------------|-------------------------------------------|--------------------------------------------------------------------------------------------------------------------------------------------------------------------|--------------------------------------------------------------------|----------------------------------------------------------------------------------------------------------------------------------------------------------------------------|
|                     |                                           |                                                                                                                                                                    | AAV8-pCBh-Cre                                                      |                                                                                                                                                                            |
| Negative Control    | WT (No Cre)                               | WT mice.                                                                                                                                                           | AAV2/10-Bmal1ext-DIO-luc                                           | Negative control to determine background bioluminescence.                                                                                                                  |
| Fig. 3              |                                           |                                                                                                                                                                    |                                                                    |                                                                                                                                                                            |
| Controls            | LSL-Cas9-GFP/+;<br>PER2::luc/+            | Rosa26 knockin of LSL-Cas9-GFP driven by a ubiquitous promoter. Since Cre was absent, neither Cas9 nor GFP were expressed. PER2::luc was expressed in all cells.   | AAV2/8-U6-sgBmal1-pCBh-mCherry <sup>NLS</sup> (E1 or E3)           | Ubiquitous expression of mCherry-NLS to report virus spread. In the presence of Cas9, a cut at the desired locus within the <i>Bmal1</i> gene was made.                    |
| Aldh1L1-Bmal1-/-    | Aldh1L1/+; LSL-Cas9-GFP/+;<br>PER2::luc/+ | Rosa26 knockin of LSL-Cas9-GFP driven by ubiquitous promoter. Cas9 and GFP were expressed in Aldh1L1(+) cells only. Global expression of PER2::luc.                | AAV2/8-U6-sgBmal1-pCBh-mCherry <sup>NLS</sup> (E1 or E3)           | Non-homologous end joining (NHEJ) of DNA led to a frame shift and premature stop codon in the Bmal1 gene in most Cas9-expressing cells.                                    |
| Fig. S2             |                                           |                                                                                                                                                                    |                                                                    |                                                                                                                                                                            |
| sgLacZ              | LSL-Cas9-GFP/+;<br>PER2::luc/+            | Rosa26 knockin of LSL-Cas9-GFP driven by ubiquitous promoter. Cas9 and GFP were expressed only in the presence of Cre recombinase. Global expression of PER2::luc. | AAV2/8-pCBh-Cre +<br>AAV2/8-U6-sgLacZ-pCBh-mCherry <sup>NLS</sup>  | Ubiquitous expression of mCherry-NLS and Cre. Since lacZ is absent in the mammalian genome, sgLacZ is a control vector designed to test the specificity of sgRNA sequence. |
| sgBmal1 (E1 and E3) | LSL-Cas9-GFP/+;<br>PER2::luc/+            |                                                                                                                                                                    | AAV2/8-pCBh-Cre +<br>AAV2/8-U6-sgBmal1-pCBh-mCherry <sup>NLS</sup> | Ubiquitous expression of mCherry-NLS and Cre. In the presence of Cas9, a cut at a desired locus within                                                                     |

|                                           |                                                                      |                                                                                                                                                                                                                                                                   |                   |                                                                                                                                                   |
|-------------------------------------------|----------------------------------------------------------------------|-------------------------------------------------------------------------------------------------------------------------------------------------------------------------------------------------------------------------------------------------------------------|-------------------|---------------------------------------------------------------------------------------------------------------------------------------------------|
|                                           |                                                                      |                                                                                                                                                                                                                                                                   | (E1 or E3)        | the Bmal1 gene was made and non-homologous end joining (NHEJ) of DNA leads to frame shift and premature stop codon in most Cas9-expressing cells. |
| Data not shown (related to fig. 3)        |                                                                      |                                                                                                                                                                                                                                                                   |                   |                                                                                                                                                   |
| AAV8-GFAP-GFP                             | Bmal1 <sup>f/f</sup> ;<br>PER2::luc/PER2::luc                        | Bmal1 conditional knockout in GFAP(+) cells. Global expression of PER2::luc.                                                                                                                                                                                      | AAV8-GFAP-GFP     | GFP expression was driven by GFAP promoter.                                                                                                       |
| AAV8-GFAP-Cre                             | Bmal1 <sup>f/f</sup> ;<br>PER2::luc/PER2::luc                        | Bmal1 conditional knockout. Global expression of PER2::luc.                                                                                                                                                                                                       | AAV8-GFAP-Cre-GFP | Cre and GFP expression were driven by GFAP promoter.                                                                                              |
| Fig. 4a-d                                 |                                                                      |                                                                                                                                                                                                                                                                   |                   |                                                                                                                                                   |
| CK1 <sup>ε</sup> <sup>tau/+</sup>         | CK1 <sup>ε</sup> <sup>tau/+</sup> ;<br>PER2::luc/+                   | Heterozygous <i>tau</i> mutation in casein kinase 1 epsilon gene led to short period (~22h) phenotype. Global expression of PER2::luc.                                                                                                                            | None.             | None.                                                                                                                                             |
| Aldh1L1-CK1 <sup>ε</sup> <sup>tau/+</sup> | Aldh1L1-Cre/+;<br>CK1 <sup>ε</sup> <sup>tau/+</sup> ;<br>PER2::luc/+ | Heterozygous <i>tau</i> mutation in casein kinase 1 epsilon gene led to short period (~22h) phenotype. The mutation was deleted in Aldh1L1(+) cells throughout the mouse, resulting in reversal of phenotype in those cells only. Global expression of PER2::luc. | None.             | None.                                                                                                                                             |
| Fig. 4e-j                                 |                                                                      |                                                                                                                                                                                                                                                                   |                   |                                                                                                                                                   |
| AAV8-                                     | CK1 <sup>ε</sup> <sup>tau/+</sup> ;                                  | Heterozygous <i>tau</i> mutation in                                                                                                                                                                                                                               | AAV8-GFAP-GFP     | GFP expression was driven                                                                                                                         |

|               |                                                |                                                                                                                                                                                                                                                                             |                   |                                                      |
|---------------|------------------------------------------------|-----------------------------------------------------------------------------------------------------------------------------------------------------------------------------------------------------------------------------------------------------------------------------|-------------------|------------------------------------------------------|
| GFAP-GFP      | PER2::luc/+                                    | casein kinase 1 epsilon gene led to short period (~22h) phenotype. Global expression of PER2::luc.                                                                                                                                                                          |                   | by GFAP promoter.                                    |
| AAV8-GFAP-Cre | CK1 $\epsilon^{\text{tau}/+}$ ;<br>PER2::luc/+ | Heterozygous <i>tau</i> mutation in casein kinase 1 epsilon gene led to short period (~22h) phenotype. The mutation was deleted in infected SCN GFAP(+) cells throughout the mouse, resulting in reversal of phenotype in those cells only. Global expression of PER2::luc. | AAV8-GFAP-Cre-GFP | Cre and GFP expression were driven by GFAP promoter. |

Jackson Lab Stock Number or citation:

|                                        |                |
|----------------------------------------|----------------|
| Aldh1L1-Cre/+                          | Jax: 023748    |
| CK1 $\epsilon^{\text{tau}/\text{tau}}$ | PMID: 18400165 |
| LSL-Cas9-eGFP                          | Jax: 024858    |
| LSL-GFP <sup>NLS</sup>                 | Jax: 008516    |
| PER2::luc                              | Jax: 006852    |
| VIP-IRES-Cre                           | Jax: 010908    |
| Bmal1 <sup>f/f</sup>                   | Jax: 007668    |

## Supplemental Experimental Procedures

### Immunohistochemistry.

Animals were sacrificed between ZT 2-4 by transcardial perfusion of PBS followed by 4% paraformaldehyde and their brains harvested and cryoprotected. We made 30  $\mu\text{m}$  coronal brain sections using a cryostat. Immunostaining was performed as previously described. [S1] Primary antibodies used were rabbit anti-BMAL1 (NB100-2288, Novus, 1:5000), rabbit anti-GFAP (Z0334, Dako, 1:100), chicken anti-GFP (ab13970, Abcam, 1:2000), mouse anti-AVP (PS41, gift from Dr. Harold Gainer, NINDS, 1:50), and mouse anti-FOX2 (ab57154, Abcam, 1:200). Secondary antibodies used were Alexa Fluor 488-conjugated Goat anti-Chicken IgG, Cy3-conjugated Donkey anti-rabbit IgG, Alexa Fluor 594-conjugated Donkey anti-mouse IgG and Alexa Fluor 647-conjugated Donkey anti-rabbit IgG (all from Jackson Immuno Research, 1:500). Sections were mounted with ProLong® Gold Antifade Mountant with DAPI (Thermo Scientific). Images were acquired on a Nikon A1 confocal microscope as a single z-section (optical section thickness of 2.73 $\mu\text{m}$ ). Images were taken sequentially averaging 4 images for each of the four-color channels. Observers blinded to the treatment groups counted cells within the SCN that expressed one or more of the targeted antigens using ImageJ software [S2].

### Behavior recording.

Mice were maintained in the Danforth animal facility at Washington University. Adult mice were housed individually in cages equipped with running wheels and maintained in light-tight chambers illuminated with fluorescent bulbs (General Electric). Running wheel activity was recorded in 6-min bins (Clocklab, Actimetrics). Period was determined by  $\chi^2$  periodogram using Clocklab software.

### Bioluminescence Recording.

Unless otherwise specified, 300- $\mu\text{m}$  coronal SCN slices were prepared from adult animals. Briefly, mice were sacrificed with  $\text{CO}_2$  and decapitated. Brains were quickly collected in chilled Hank's balanced salt solution (HBSS), pH 7.2 (Sigma), supplemented with 0.01 M HEPES (Sigma), 100 U/mL penicillin, 0.1 mg/mL streptomycin, and 4 mM  $\text{NaHCO}_3$  (Invitrogen). Brain sections were obtained with a vibratome (OTS-5000; Electron Microscopy Sciences). Each SCN was dissected and cultured individually on a Millicell-CM membrane (Millipore) in a 35mm Petri dish with 1 mL of DMEM (Sigma) supplemented with 10 mM HEPES (Sigma), 2.2 mg/mL  $\text{NaHCO}_3$  (Invitrogen), and 0.1 mM beetle D-luciferin (Biosynth). Petri dishes were sealed with vacuum grease and placed under photomultiplier tubes (HC135-11MOD; Hamamatsu) at 36 °C in the dark. Bioluminescence was recorded in 6-min bins (PER2::luc) or 10-min bins (AAV2/10-Bmal1ext-DIO-luc). Acquired *in vitro* bioluminescence traces were detrended by division and fitted with a damped sine function (Chronostar 1.0 [3]), and traces with a coefficient of correlation  $>0.80$  and period between 18-30h were defined as circadian. The periods of PER2::luc and *Aldh1L1-Bmal1<sup>luc</sup>* expression were determined using Chronostar software. For CCD recordings, *Aldh1L1-Bmal1<sup>luc</sup>* SCN was imaged under 20x objective with 0.5x coupler using an ultrasensitive CCD camera (Andor iKon) mounted on an inverted microscope. Temperature was maintained at 35°C with a box incubator (In vivo Scientific). Static, cell-sized ROIs were drawn on the acquired movie in ImageJ and the acquired traces were processed through a custom Matlab script. Circadian traces from each movie were detrended by division and presented as a raster plot. We used Chronostar to determine period and rhythmicity from the raw traces. All ROIs that had a coefficient of correlation  $>0.80$  and period between 18-30h were defined as circadian and the time of their second Bmal1-Luc peak was evaluated by a Rayleigh test of uniformity using the R package "circular". [S3]

### Statistical Analysis.

All results were expressed as mean  $\pm$  SEM. For comparisons of two groups of normally distributed data, Student's t-test was performed. One-way ANOVA with Sidak's multiple comparison test was used for data shown in Fig. 3e. GraphPad Prism 7 was used to perform statistical analysis and to generate figures.



## Supplemental References

- S1. An, S., Irwin, R.P., Allen, C.N., Tsai, C., and Herzog, E.D. (2011). Vasoactive intestinal polypeptide requires parallel changes in adenylate cyclase and phospholipase C to entrain circadian rhythms to a predictable phase. *J Neurophysiol* *105*, 2289-2296.
- S2. Schneider, C.A., Rasband, W.S., and Eliceiri, K.W. (2012). NIH Image to ImageJ: 25 years of image analysis. *Nat Methods* *9*, 671-675.
- S3. Maier, B., Wendt, S., Vanselow, J.T., Wallach, T., Reischl, S., Oehmke, S., Schlosser, A., and Kramer, A. (2009). A large-scale functional RNAi screen reveals a role for CK2 in the mammalian circadian clock. *Genes Dev* *23*, 708-718.
